# Supplementary material for: Rapid determination of Ba isotope compositions for barites using a H2O-extraction method and MC-ICP-MS
Source: Royal Society of Chemistry journal article supplement (doi:10.1039/d0ja00078g), 2020-01-01
Supplement: d0ja00078g1.pdf [file d0ja00078g1.pdf]

1

Supplementary Materials for

2 **Rapid determination of Ba isotope compositions for barites using H<sub>2</sub>O-extraction**

3

**method and MC-ICP-MS**

4 **Lan-Lan Tian<sup>a</sup>, Ying-Zeng Gong<sup>b</sup>, Wei Wei<sup>a</sup>, Jin-Ting Kang<sup>a</sup>, Hui-Min Yu<sup>a,c</sup>,**

5

**Fang Huang<sup>\*a,c</sup>**

6

7 <sup>a</sup> CAS Key Laboratory of Crust-Mantle Materials and Environments, School of Earth

8 and Space Sciences, University of Science and Technology of China, Hefei, Anhui

9 230026, China. E-mail: [fhuang@ustc.edu.cn](mailto:fhuang@ustc.edu.cn)

10 <sup>b</sup> Yunnan University, Kunming, Yunnan, 650500, China

11 <sup>c</sup> CAS Center for Excellence in Comparative Planetology, USTC, Hefei, Anhui

12 230026, China

13

14 Table S1. The  $\delta^{138/134}\text{Ba}$  of barite standards after filtering or extracting the top clear

15 part of the whole supernatant.

16

| Sample   | Filtered Supernatant          |                                 |      |      | Top part of Supernatant       |                                 |       |   |
|----------|-------------------------------|---------------------------------|------|------|-------------------------------|---------------------------------|-------|---|
|          | $C_{ \text{Ba} }/\mu\text{g}$ | $\delta^{138/134}\text{Ba}$ (‰) | 2SD  | n    | $C_{ \text{Ba} }/\mu\text{g}$ | $\delta^{138/134}\text{Ba}$ (‰) | 2SD   | n |
| NBS127   | 2.5                           | -0.22                           | 0.00 | 4    | 2.0                           | -0.21                           | 0.02  | 2 |
|          | 136.6                         | -0.28                           | 0.00 | 4    |                               |                                 |       |   |
| Average  | 69.5                          | -0.25                           | 0.08 | 8    |                               |                                 |       |   |
| GBW07811 | 4.1                           | 0.06                            | 0.02 | 2    | 1.5                           | 0.07                            | 0.01  | 2 |
| GBW07814 | 2.8                           | 0.19                            | 0.04 | 2    | 1.6                           | 0.09                            | 0.03  | 2 |
| GBW07816 | 0.3                           | 0.23                            | 0.01 | 2    | 0.2                           | 0.07                            | 0.03  | 2 |
|          | 7.6                           | 0.02                            | 0.04 | 2    |                               |                                 |       |   |
|          | 9.3                           | -0.04                           | 0.02 | 2    |                               |                                 |       |   |
|          | Average                       | 5.7                             | 0.07 | 0.28 |                               |                                 |       |   |
| GBW07812 | 2.9                           | 0.57                            | 0.01 | 4    | 1.6                           | 0.540                           | 0.023 | 2 |
|          | 5.2                           | 0.51                            | 0.02 | 4    |                               |                                 |       |   |
|          | 23.5                          | 0.32                            | 0.04 | 4    |                               |                                 |       |   |
|          | 19.3                          | 0.42                            | 0.01 | 2    |                               |                                 |       |   |
| Average  | 12.7                          | 0.46                            | 0.21 | 14   |                               |                                 |       |   |

17

18

19 Table S2. Measurement of  $\delta^{138/134}\text{Ba}$  of GBW07812 and GBW07816 in 3 mol L<sup>-1</sup>HCl  
 20 and 3 mol L<sup>-1</sup> HNO<sub>3</sub> extraction media.

21

| Sample   | 3 mol L <sup>-1</sup> HCl |                                 |      |   | 3 mol L <sup>-1</sup> HNO <sub>3</sub> |                                 |      |   |
|----------|---------------------------|---------------------------------|------|---|----------------------------------------|---------------------------------|------|---|
|          | C <sub>[Ba]</sub> /μg     | $\delta^{138/134}\text{Ba}$ (‰) | 2SD  | n | C <sub>[Ba]</sub> /μg                  | $\delta^{138/134}\text{Ba}$ (‰) | 2SD  | n |
| GBW07812 | 156.5                     | 0.47                            | 0.04 | 2 | 368.4                                  | 0.38                            | 0.02 | 2 |
|          | 194.0                     | 0.51                            | 0.01 | 2 | 291.8                                  | 0.33                            | 0.00 | 2 |
| Average  | 175.2                     | 0.49                            | 0.05 | 4 | 330.1                                  | 0.35                            | 0.07 | 4 |
| GBW07816 | 68.0                      | 0.30                            | 0.04 | 2 | 28.3                                   | 0.07                            | 0.05 | 2 |
|          | 36.1                      | 0.31                            | 0.03 | 2 | 88.5                                   | 0.10                            | 0.06 | 4 |
| Average  | 52.1                      | 0.31                            | 0.02 | 4 | 58.4                                   | 0.08                            | 0.04 | 6 |

23 Table S3. Measurement of  $\delta^{138/134}\text{Ba}$  of GBW07812 and GBW07816 in different  
 24 extraction duration.

25

| Sample   | Extraction time<br>(hours) | $C_{[\text{Ba}]}/\mu\text{g}$ | $\delta^{138/134}\text{Ba}$ (‰) | 2SD  | n    |
|----------|----------------------------|-------------------------------|---------------------------------|------|------|
| GBW07812 | 2                          | 175.6                         | 0.35                            | 0.03 | 2    |
|          | 4                          | 130.4                         | 0.35                            | 0.01 | 2    |
|          | 7                          | 77.0                          | 0.34                            | 0.01 | 2    |
|          | 16                         | 105.0                         | 0.31                            | 0.04 | 2    |
|          | 24                         | 71.6                          | 0.30                            | 0.02 | 2    |
|          | 89                         | 59.7                          | 0.31                            | 0.02 | 2    |
|          | 89                         | 92.4                          | 0.30                            | 0.05 | 2    |
|          | Average                    |                               | 106.7                           | 0.32 | 0.05 |
| GBW07816 | 2                          | 33.5                          | -0.01                           | 0.04 | 2    |
|          | 4                          | 10.6                          | -0.02                           | 0.04 | 2    |
|          | 7                          | 29.9                          | -0.05                           | 0.02 | 2    |
|          | 24                         | 23.6                          | 0.01                            | 0.04 | 2    |
|          | 16                         | 19.7                          | 0.04                            | 0.01 | 2    |
|          | 89                         | 13.8                          | 0.03                            | 0.01 | 2    |
|          | 89                         | 13.4                          | 0.02                            | 0.03 | 2    |
|          | Average                    |                               | 20.6                            | 0.00 | 0.06 |

26

27

28 Table S4.  $\delta^{138/134}\text{Ba}$  of GBW07812 and GBW07816 using different sample/water  
 29 weight ratios.

30

| <b>Sample</b> | <b>Sample/water ratio</b> | <b><math>C_{ \text{Ba} }/\mu\text{g}</math></b> | <b><math>\delta^{138/134}\text{Ba}</math> (‰)</b> | <b>2SD</b> | <b>n</b> |
|---------------|---------------------------|-------------------------------------------------|---------------------------------------------------|------------|----------|
| GBW07812      | 1:400                     | 45.9                                            | 0.36                                              | 0.03       | 2        |
|               | 1:80                      | 71.2                                            | 0.36                                              | 0.02       | 2        |
|               | 1:40                      | 36.7                                            | 0.33                                              | 0.03       | 2        |
| Average       |                           | 51.3                                            | 0.35                                              | 0.03       | 6        |
| GBW07816      | 1:400                     | 57.6                                            | 0.03                                              | 0.01       | 2        |
|               | 1:80                      | 33.2                                            | 0.02                                              | 0.01       | 2        |
|               | 1:40                      | 109.7                                           | 0.02                                              | 0.04       | 2        |
| Average       |                           | 66.9                                            | 0.02                                              | 0.02       | 6        |

31

32

33

34

35 Fig. S1 Effect of the different extraction media on  $\delta^{138/134}\text{Ba}$  analyses. Error bars  
36 reflect two standard deviations. Data are available in Table S2.

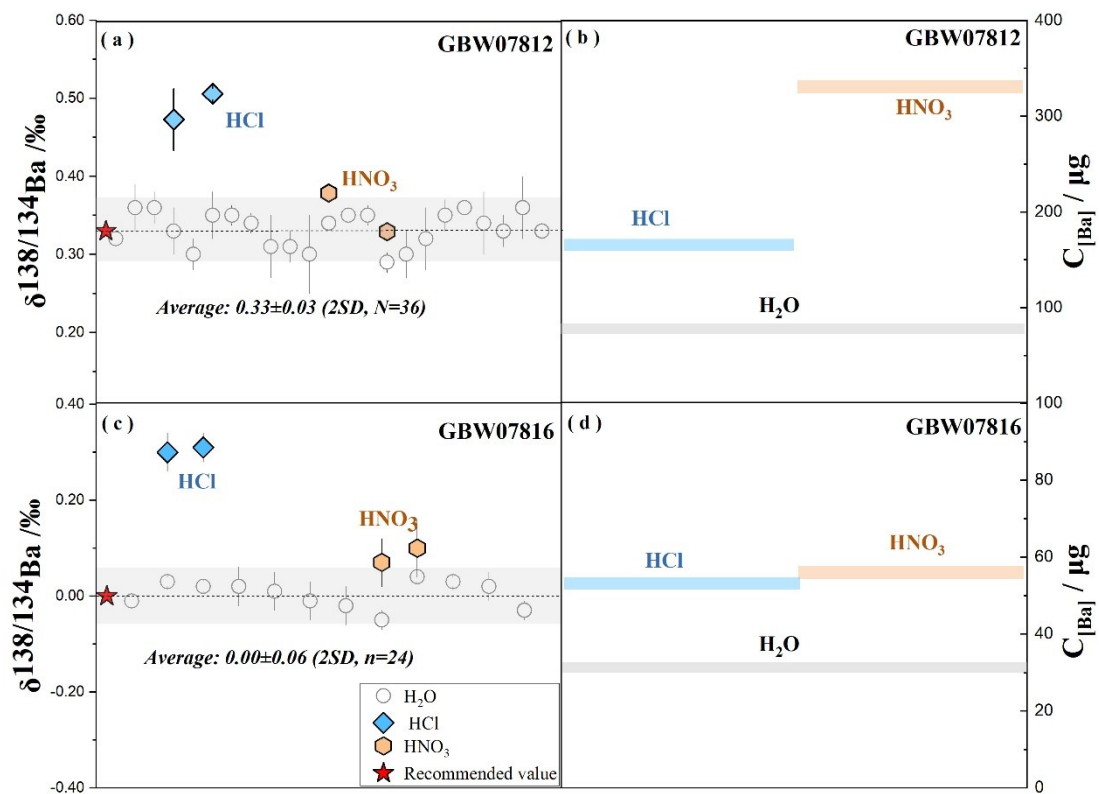

37

38

39 Fig. S2 Effect of the different extraction duration on  $\delta^{138/134}\text{Ba}$  analyses. Error bars  
40 reflect two standard deviations. Data are available in Table S3.

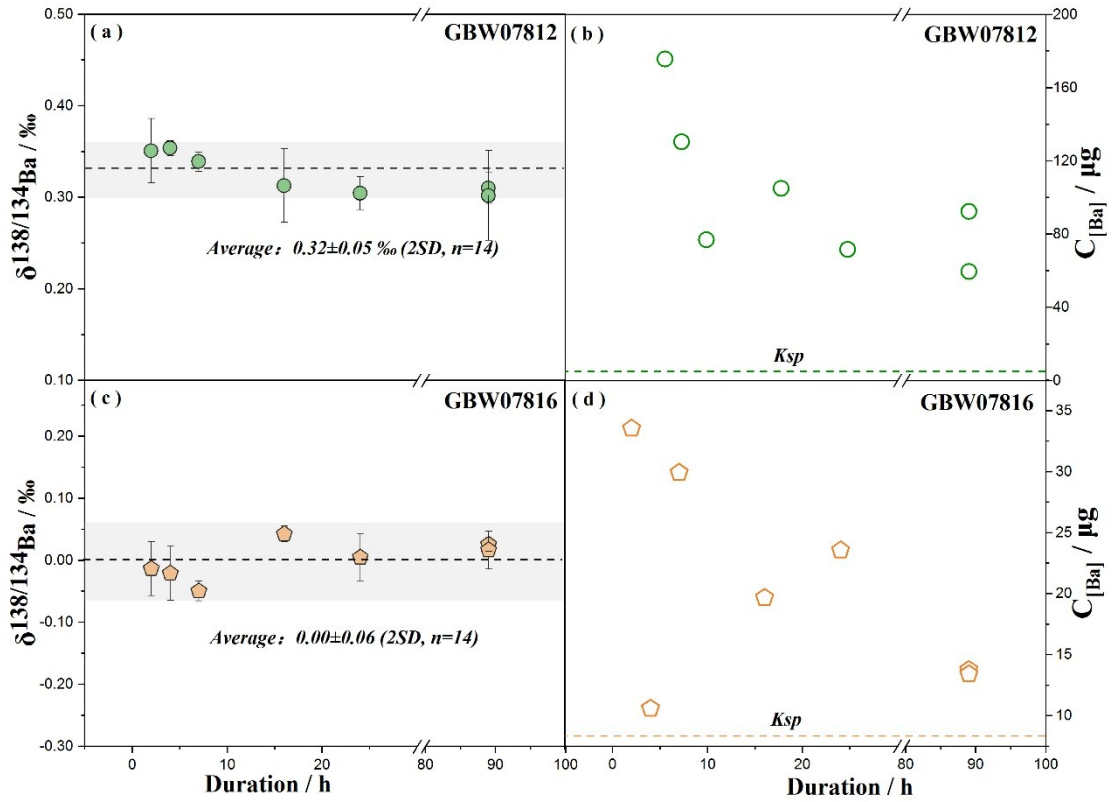

41  
42

43 Fig. S3 Effect of the sample/water weight ratio on  $\delta^{138/134}\text{Ba}$  analyses. Error bars  
44 reflect two standard deviations. Data are available in Table S4.

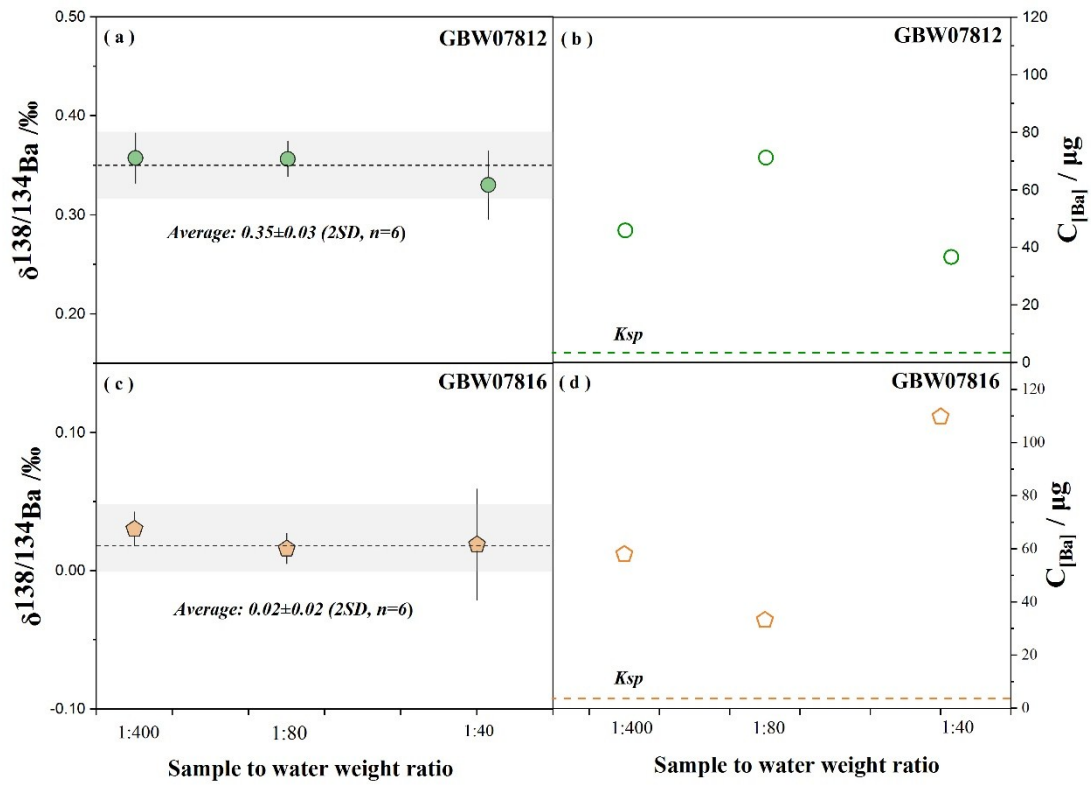

45  
46  
47
